# Supplementary material for: The Fungal Metabolite Brefeldin A Inhibits Dvl2-Plk1-Dependent Primary Cilium Disassembly
Source: PubMed Central journal article supplement — Mol Cells. 2017 Jun 14;40(6):401–9. doi: 10.14348/molcells.2017.0032 (PMC5523016; doi:10.14348/molcells.2017.0032), 2017-06-14
Supplement: molce-40-6-401-supple2.pdf [file molce-40-6-401-supple2.pdf]

## **SUPPLEMENTARY INFORMATION**

### **The Fungal Metabolite Brefeldin A Inhibits Dvl2-Plk1-dependent Primary Cilium**

#### **Disassembly**

Uijeong Lee, Sun-Ok Kim, Jeong-Ah Hwang, Jae-Hyuk Jang, Sangkeun Son, In-Ja Ryoo,  
Jong Seog Ahn, Bo Yeon Kim,\* and Kyung Ho Lee\*

\* Corresponding author. E.mail: leekh@kribb.re.kr, bykim@kribb.re.kr



**Supplementary Table S1.** An Excel file containing the list of chemical library and the first round of screening data.

**Supplementary Table S2.** Antibodies used in immunoblotting analyses.

| Antibodies              | Host Species | Dilution | Source                                           |
|-------------------------|--------------|----------|--------------------------------------------------|
| anti-Dvl2               | rabbit       | 1:1000   | Cell Signaling, Danvers, MA                      |
| anti-Plk1               | mouse        | 1:500    | SantaCruz, Santa Cruz, CA                        |
| anti-CK1 $\epsilon$     | Mouse        | 1:1000   | BD Transduction Laboratories, Franklin Lakes, NJ |
| anti-Cyclin A           | rabbit       | 1:1000   | SantaCruz, Santa Cruz, CA                        |
| anti-Cyclin B1          | rabbit       | 1:1000   | Cell Signaling, Danvers, MA                      |
| anti-Cyclin D1          | rabbit       | 1:1000   | SantaCruz, Santa Cruz, CA                        |
| anti-Cyclin E1          | mouse        | 1:1000   | Cell Signaling, Danvers, MA                      |
| anti- $\alpha$ -tubulin | rabbit       | 1:1000   | Abcam, Cambridge, MA                             |
| anti-Flag               | mouse        | 1:1000   | Sigma, St. Louis, MO                             |
| anti-HA                 | mouse        | 1:500    | SantaCruz, Santa Cruz, CA                        |
| anti-c-Myc              | mouse        | 1:1000   | SantaCruz, Santa Cruz, CA                        |

**Supplementary Table S3.** Primers used in RT-PCR analyses.

| Target Genes | Primer Sequences |                              |
|--------------|------------------|------------------------------|
| PIK1         | Forward          | 5'-ACCAGCACGTCGTAGGATTC-3'   |
|              | Reverse          | 5'-ATAACTCGGTTTCGGTGACAG-3'  |
| Dvl2         | Forward          | 5'- GCACCATTACATCTGGATCGT-3' |
|              | Reverse          | 5'-GTAGAGCCAGTCAACCACAT-3'   |
| GAPDH        | Forward          | 5'-AGCCACATCGCTCAGACAC-3'    |
|              | Reverse          | 5'-GCCCAATACGACCAAATCC-3'    |
